# Supplementary material for: Direct optical activation of skeletal muscle fibres efficiently controls muscle contraction and attenuates denervation atrophy
Source: PubMed Central journal article supplement (PMC4633712; doi:10.1038/ncomms9506), 2015-10-13
Supplement: ncomms9506-s1.pdf [file ncomms9506-s1.pdf]

Supplementary Figure 1.

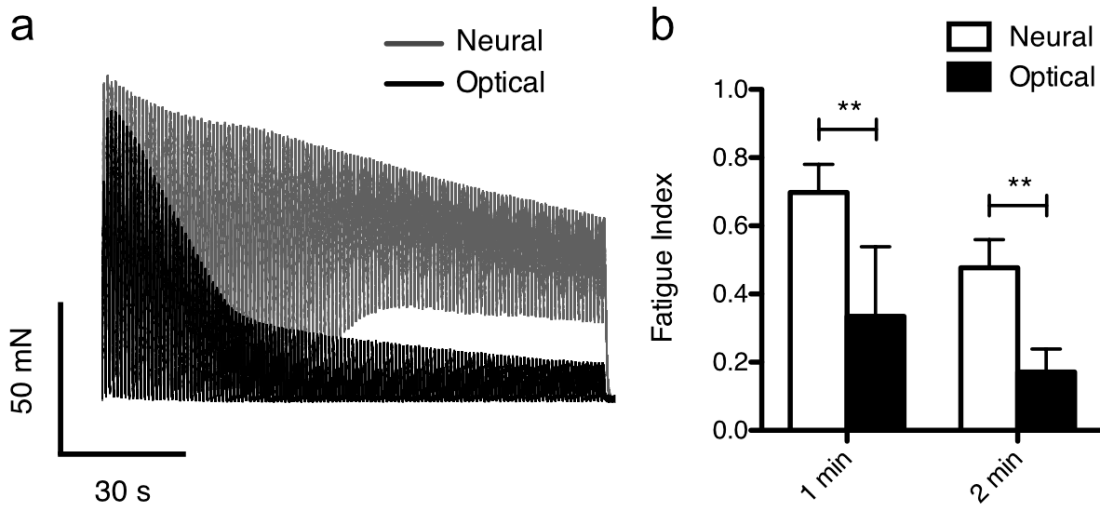

**Fatigue test performed using neural or optical stimulation.** Stimulation was performed at 40 Hz stimulation sustained over 350 ms and repeated every second for 2 minutes. Parameters for stimulation were those of twitch stimuli as described in methods. (a) Representative force curves show a more rapid fatigue of optical stimulation compared to neural stimulation. (b) Bar graph of fatigue index under neural and optical stimulation at one and two minutes (n=6). Data represented as means  $\pm$  s.d. Statistical significance by two-way ANOVA with Bonferroni multiple comparisons. \*\* p<0.01
